# Supplementary material for: The Genome of Bacillus velezensis SC60 Provides Evidence for Its Plant Probiotic Effects
Source: MDPI journal article supplement (doi:10.3390/microorganisms10040767), 2022-04-01
Supplement: s1 [file s1]

# The Genome of *Bacillus velezensis* SC60 Provides Evidence for Its Plant Probiotic Effects

Xiaoyan Dong <sup>1</sup>, Chen Tu <sup>1</sup>, Zhihong Xie <sup>2,\*</sup>, Yongming Luo <sup>1,3</sup>, Lei Zhang <sup>1,4</sup> and Zhaoyi Li <sup>1</sup>

<sup>1</sup> CAS Key Laboratory of Coastal Environmental Processes and Ecological Remediation, Yantai Institute of Coastal Zone Research, Chinese Academy of Sciences, Yantai 264003, China; xydong@yic.ac.cn (X.D.); ctu@yic.ac.cn (C.T.); ymluo@yic.ac.cn (Y.L.); leizhang@iae.ac.cn (L.Z.); lizhaoyichloe@163.com (Z.L.)

<sup>2</sup> National Engineering Research Center for Efficient Utilization of Soil and Fertilizer Resources, College of Resources and Environment of Shandong Agricultural University, Taian 271000, China

<sup>3</sup> CAS Key Laboratory of Soil Environment and Pollution Remediation, Institute of Soil Science, Chinese Academy of Sciences, Nanjing 210008, China

<sup>4</sup> Institute of Applied Ecology, Chinese Academy of Sciences, Shenyang 110016, China

\* Correspondence: zhihongxie211@163.com

**Table S1.** Indicator strains used in this study.

| Indicator strains                             | origin/reference |
|-----------------------------------------------|------------------|
| <i>Bacillus velezensis</i>                    | Laboratory stock |
| <i>Bacillus halotolerans</i>                  | Laboratory stock |
| <i>Bacillus subtilis</i>                      | Laboratory stock |
| <i>Bacillus amyloliquefaciens</i>             | Laboratory stock |
| <i>Bacillus fordii</i>                        | Laboratory stock |
| <i>Bacillus megaterium</i>                    | Laboratory stock |
| <i>Bacillus brevis</i>                        | Laboratory stock |
| <i>Bacillus cereus</i>                        | Laboratory stock |
| <i>Ralstonia solanacearum</i>                 | Laboratory stock |
| <i>Fusarium oxysporum.sp.cucumebrium</i> Owen | Laboratory stock |
| <i>Fusarium Verticillioides</i>               | Laboratory stock |
| <i>Phytophthora capsici</i>                   | Laboratory stock |
| <i>Fusarium graminearum</i> schw              | Laboratory stock |
| <i>Aspergillus niger</i> Van Tiegh            | Laboratory stock |
| <i>Fusarium solani</i>                        | Laboratory stock |
| <i>Botrytis cinerea</i> Pers.ex Fr            | Laboratory stock |
