# Supplementary material for: The Genome of Bacillus velezensis SC60 Provides Evidence for Its Plant Probiotic Effects
Source: MDPI journal article supplement (doi:10.3390/microorganisms10040767), 2022-04-01
Supplement: s1 [file s1]

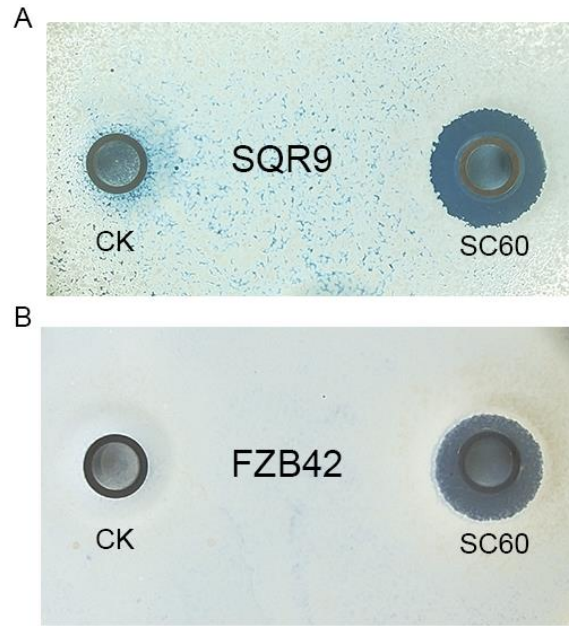

**Figure S1.** Antagonistic activity of strain SC60 against closely related *Bacillus velezensis*. A. Antagonistic activity of strain SC60 fermentation broth against *Bacillus velezensis* SQR9; B. Antagonistic activity of strain SC60 fermentation broth against *Bacillus velezensis* FZB42.
